# Supplementary material for: Co-doped g-C3N4 nanotube decorated separators mediate polysulfide redox for high performance lithium sulfur batteries
Source: Royal Society of Chemistry journal article supplement (doi:10.1039/d2na00645f), 2022-11-22
Supplement: d2na00645f1.pdf [file d2na00645f1.pdf]

**Supporting information for**  
**Co-doped g-C<sub>3</sub>N<sub>4</sub> nanotubes decorated separators**  
**mediate polysulfide redox for high performance**  
**lithium sulfur batteries**

Zunhao Fan,<sup>a</sup> Mengting Zhu,<sup>a, b</sup> Shungui Deng,<sup>b</sup> Yanhua Chen,<sup>c</sup> Yue Zhao,<sup>b,e</sup>

Mengyuan Qin,<sup>a</sup> Guiyuan Ma,<sup>a</sup> Jinghua Wu,<sup>b, d</sup> \* Xing Xin<sup>a\*</sup>

<sup>a</sup> School of Material Science and Chemical Engineering, Ningbo University, Ningbo 315211, P. R. China

<sup>b</sup> Ningbo Institute of Materials Technology and Engineering, Chinese Academy of Sciences, Ningbo 315201, P. R. China

<sup>c</sup> Zhejiang Fashion Institute of Technology, Ningbo 315211, Zhejiang, P. R. China

<sup>d</sup> Center of Materials Science and Optoelectronics Engineering, University of Chinese Academy of Sciences, Beijing 100049, P. R. China

<sup>e</sup> Key Laboratory of Material Physics, Ministry of Education, School of Physics and Microelectronics, Zhengzhou University, Zhengzhou 450001, China

\*Corresponding authors: xinxing@nbu.edu.cn, wujh@nimte.ac.cn

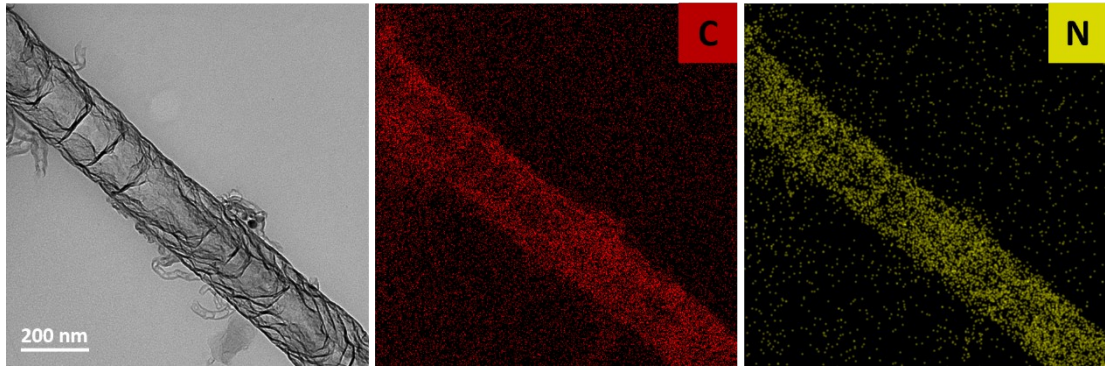

**Fig. S1.** STEM-EDX mapping of Co-TCN

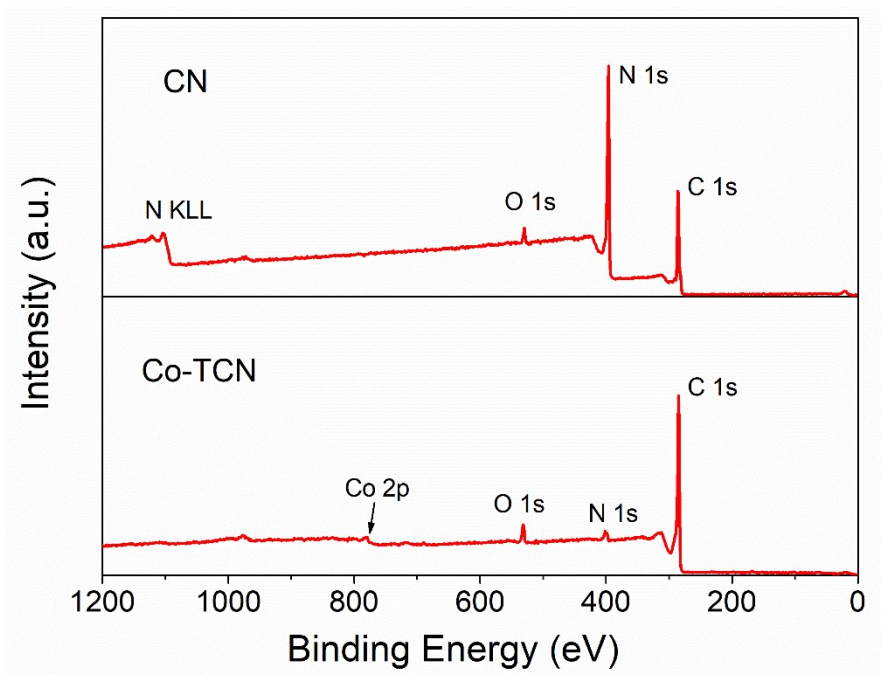

**Fig. S2.** XPS spectra of full spectrum for Co-TCN sample.

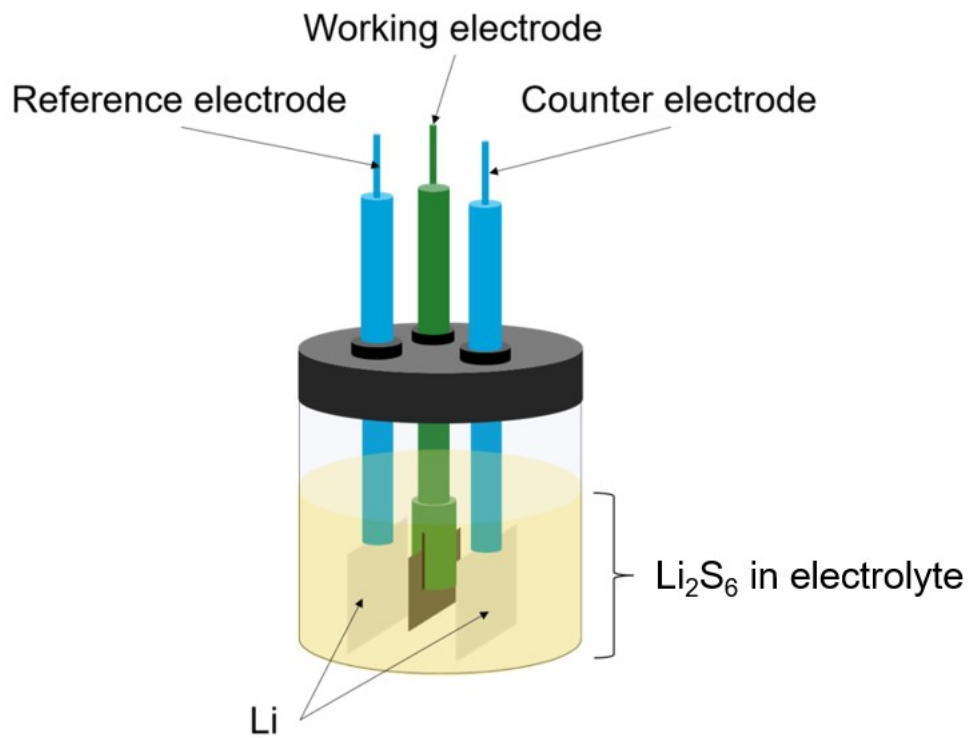

**Fig. S3.** Diagram of elucidated by exchange current measurements using linear scanning voltammetry (LSV) with a  $\text{Li}_2\text{S}_6$  solution in a three-electrode cell.

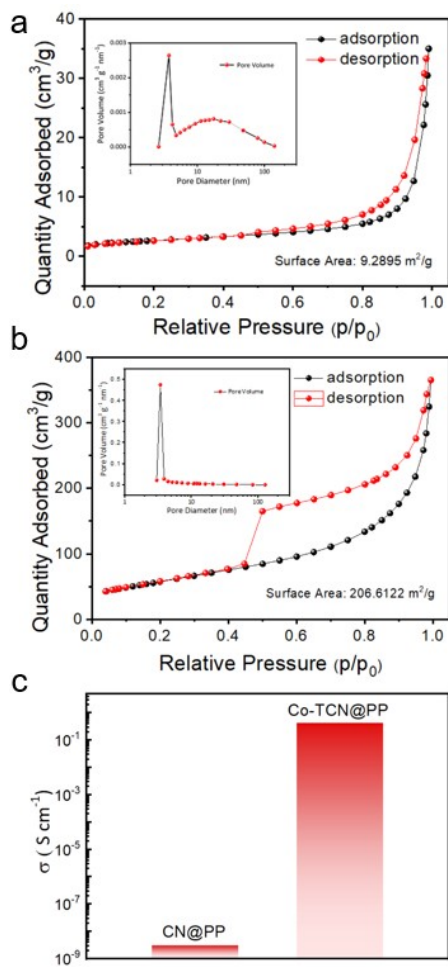

**Fig. S4.**  $N_2$  adsorption/desorption isotherms of g) CN and h) Co-TCN. i) Conductivity of CN and Co-TCN.

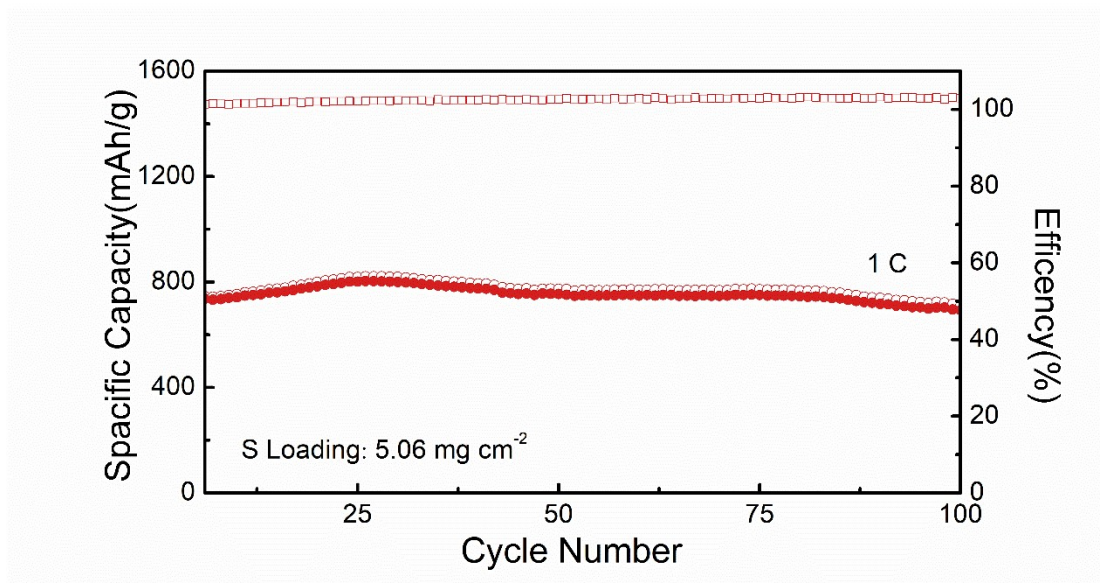

**Fig. S5.** Cycling performances of Co-TCN with high loading at current density of 1 C.

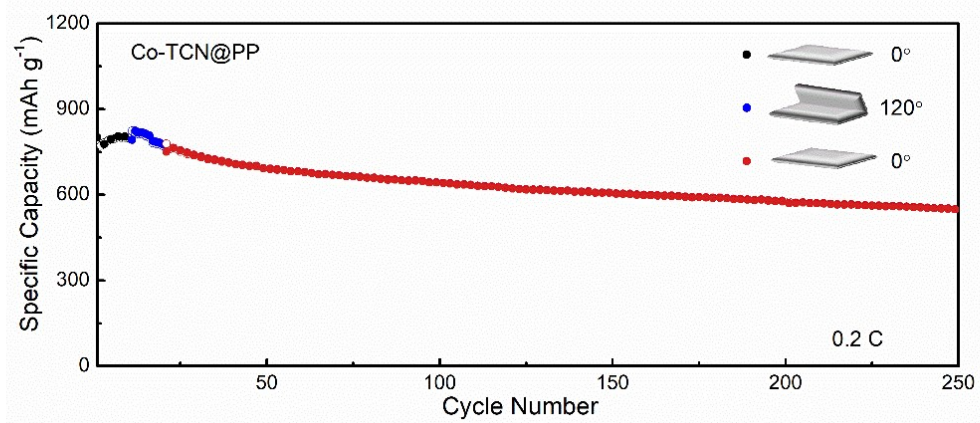

**Fig. S6.** Cycling performances of Co-TCN assembled Li-S pouch cell at 0.2 C.

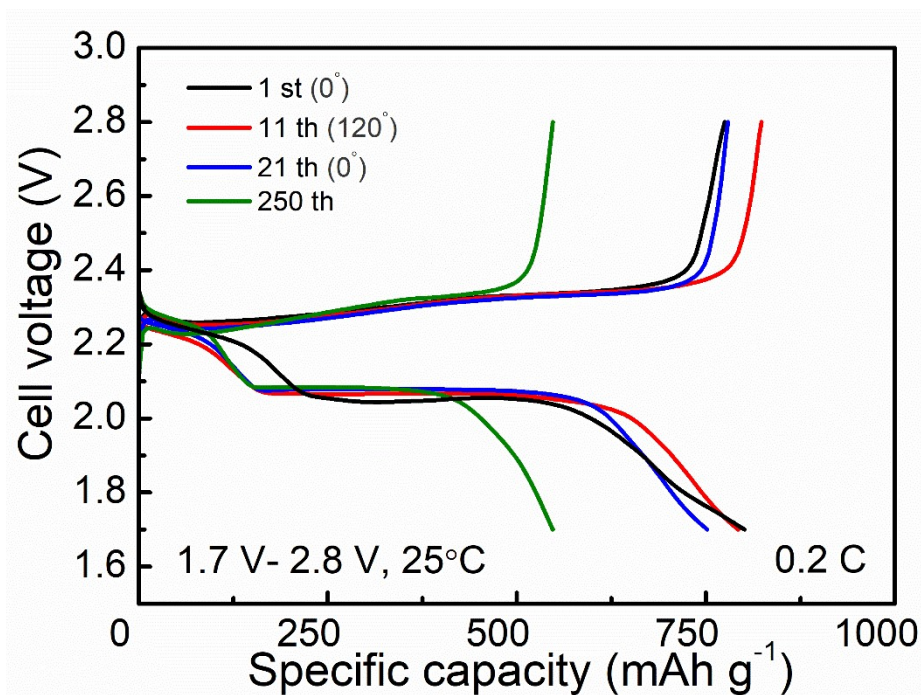

**Fig. S7.** Discharge-charge profiles of Co-TCN assembled Li-S pouch cell at 0.2 C.



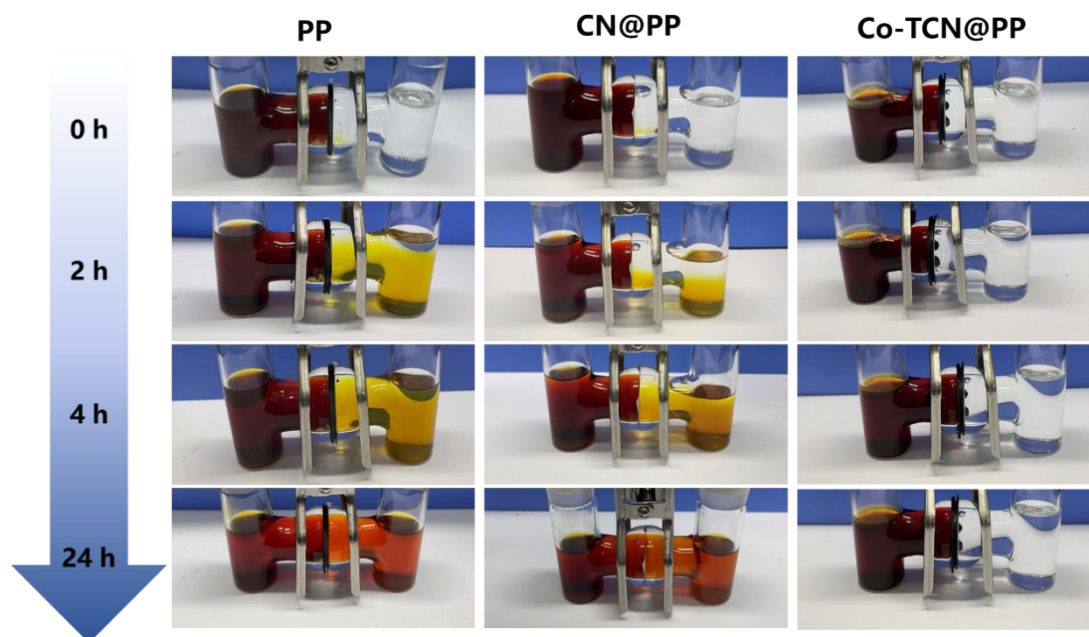

**Fig.S8.** Photographs of the glass cells with  $\text{Li}_2\text{S}_6$  in DOL/DME solution and pure DOL/DME solvent in the left and right chambers, respectively, separated by pp, CN@PP or Co-TCN@PP.

Table S1. The setup parameter of coin cells and pouch cells.

| <b>Coin cell test information</b>                         |                                                                                                                                                                                                                                                          |
|-----------------------------------------------------------|----------------------------------------------------------------------------------------------------------------------------------------------------------------------------------------------------------------------------------------------------------|
| <b>Active material</b>                                    | Cathode: Sulful (1675 mAh/g)                                                                                                                                                                                                                             |
| <b>Additive</b>                                           | Ketjenblack                                                                                                                                                                                                                                              |
| <b>Binder</b>                                             | PVDF                                                                                                                                                                                                                                                     |
| <b>Electrolyte</b>                                        | 1M LiTFSi and 1wt% LiNO <sub>3</sub> in DOL and DME (v:v,1:1)                                                                                                                                                                                            |
| <b>Current collector</b>                                  | Al                                                                                                                                                                                                                                                       |
| <b>Separator</b>                                          | Co-TCN@PP                                                                                                                                                                                                                                                |
| <b>Pouch cell test information</b>                        |                                                                                                                                                                                                                                                          |
|                                                           | Anode: Li                                                                                                                                                                                                                                                |
|                                                           | Cathode: S/KB                                                                                                                                                                                                                                            |
| <b>Comments</b>                                           | We tested both pouch cells and coin cells. The S loading was controlled to 1 mg/cm <sup>2</sup> .The highest can reach to 5.6 mg/cm <sup>2</sup> . The area of the electrode was 1.3 cm <sup>2</sup> for coin cell and 4 cm <sup>2</sup> for pouch cell. |
| <b>Measurements and Calculations</b>                      |                                                                                                                                                                                                                                                          |
| <b>1C = 1675 mA/g Capacity = current density*time (h)</b> |                                                                                                                                                                                                                                                          |
| <b>Initial capacity (mAh/g)</b>                           | 863                                                                                                                                                                                                                                                      |
| <b>Capacity achieved (mAh/g)</b>                          | 621                                                                                                                                                                                                                                                      |
| <b>@rate</b>                                              | 2C                                                                                                                                                                                                                                                       |
| <b>Number of cycles tested</b>                            | 400                                                                                                                                                                                                                                                      |
| <b>Capacity retention</b>                                 | 71%                                                                                                                                                                                                                                                      |
| <b>Testing temperature</b>                                | 30°C                                                                                                                                                                                                                                                     |
